# Supplementary material for: Streptococcus Thermophilus UASt-09 Upregulates Goblet Cell Activity in Colonic Epithelial Cells to a Greater Degree than other Probiotic Strains
Source: PubMed Central journal article supplement (PMC7695341; doi:10.3390/microorganisms8111758), 2020-11-09
Supplement: microorganisms-08-01758-s001.pdf [file microorganisms-08-01758-s001.pdf]

## Supplementary

**Table S1. Information of the predesigned RT-PCR primers used in the study**

| <b>Target Gene</b>                               | <b>Assay ID</b> | <b>Catalog Number</b> | <b>Supplier</b>    |
|--------------------------------------------------|-----------------|-----------------------|--------------------|
| Anterior Gradient Homolog 2(AGR2)                | Hs00356521_m1   | #4448892              | Applied Biosystems |
| Fc-Gamma Binding Protein (FCGBP)                 | Hs00175398_m1   | #4448892              | Applied Biosystems |
| Trefoil Factor 3 (TFF3)                          | Hs00902278_m1   | #4448892              | Applied Biosystems |
| Resistin-Like Molecule $\beta$ (RELM $\beta$ )   | Hs00395669_m1   | #4453320              | Applied Biosystems |
| Mucin 2 (MUC2)                                   | Hs03005103_g1   | #4448892              | Applied Biosystems |
| Glyceraldehyde-3-Phosphate Dehydrogenase (GAPDH) | Hs02786624_g1   | #4331182              | Applied Biosystems |
